# Supplementary material for: Neurogenic and angiogenic poly(N-acryloylglycine)-co-(acrylamide)-co-(N-acryloyl-glutamate) hydrogel: preconditioning effect under oxidative stress and use in neuroregeneration
Source: Royal Society of Chemistry journal article supplement (doi:10.1039/d4tb00243a), 2024-01-01
Supplement: d4tb00243a1.pdf [file d4tb00243a1.pdf]

## Supporting Information

# **Neurogenic and Angiogenic poly(N-Acryloylglycine)-co-(acrylamide)-co-(N-acryloyl-glutamate) Hydrogel: Preconditioning Effect Under Oxidative Stress and use in neuroregeneration**

Kirti Wasnik<sup>a</sup>, Prem Shankar Gupta<sup>a</sup>, Gurmeet Singh<sup>a</sup>, Samedutta Maity<sup>b</sup>, Sukanya Patra <sup>a</sup>, Divya Pareek <sup>a</sup>, Sandeep Kumar<sup>c</sup>, Vipin Rai<sup>d†</sup>, Ravi Prakash<sup>e</sup>, Arbind Acharya <sup>c</sup>, Pralay Maiti<sup>e</sup>, Sudip Mukherjee<sup>a</sup>, Yitzhak Mastai<sup>f</sup>, Pradip Paik<sup>a\*</sup>

<sup>a</sup> School of Biomedical Engineering, Indian Institute of Technology, Banaras Hindu University (BHU),  
Varanasi, Uttar Pradesh 221 005, India

<sup>b</sup> School of Engineering Sciences and Technology, University of Hyderabad, Telangana State 500 046,  
India

<sup>c</sup> Department of Zoology, Banaras Hindu University (BHU), Varanasi, Uttar Pradesh 221 005, India

<sup>d</sup> Department of Biochemistry, Institute of Sciences, Banaras Hindu University (BHU), Varanasi, Uttar  
Pradesh 221 005, India

<sup>e</sup> School of Material Science, Indian Institute of Technology, Banaras Hindu University (BHU),  
Varanasi, Uttar Pradesh 221 005, India

<sup>f</sup> Department of Chemistry and the Institute of Nanotechnology, Bar-Ilan University, Ramat-Gan,  
52900, Israel

## **Supporting Information**

The supporting information contains, Figure S1. (a) FTIR spectra of N-acryloylglycine, (b) N-acryloylglutamic acid, (c) poly[(N-acryloylglycine)-b-(acrylamide)] (d) poly (N-acryloylglycine)-co-(acrylamide)-co-(N-acryloylglutamate) polymeric hydrogel; Figure S2. (A)  $^1\text{H}$  NMR of N-acryloylglutamate monomer and (B)  $^{13}\text{C}$  NMR of N-acryloylglycine monomer; Figure S3. (A)  $^1\text{H}$  NMR of p(NAG-Ac-NAE) hydrogel and (B)  $^{13}\text{C}$  NMR of p(NAG-Ac-NAE) nanohydrogel.; Figure S4. (a) TGA and (b) DSC of the poly (N-acryloylglycine)-co-(acrylamide)-co-(N-acryloylglutamate) hydrogel; Figure S5. Shows the MALDI-TOF spectrum of p(NAG-Ac-NAE) hydrogel; Figure S6. Biodegradation behaviour of [p(NAG-Ac-NAE)] without replacing media, studied in PBS (pH 7.4) and in presence of different enzymes.; Figure S7. Size distribution and zeta potential of p(NAG-Ac-NAE) hydrogel, studied in PBS (pH 7.4), Figure S8. Cell viability of HUVEC in treatment of p(NAG-b-A) Figure S9. Anti-angiogenic property of p(NAG-b-A) hydrogel. (a) Vessel area (%) vs Time, (b) Total number of junctions (%) vs Time, (c) Junction density (%) vs time and (d) Total Vessel length (%) vs time. List of abbreviations is provided in supporting file.

## Supporting Information

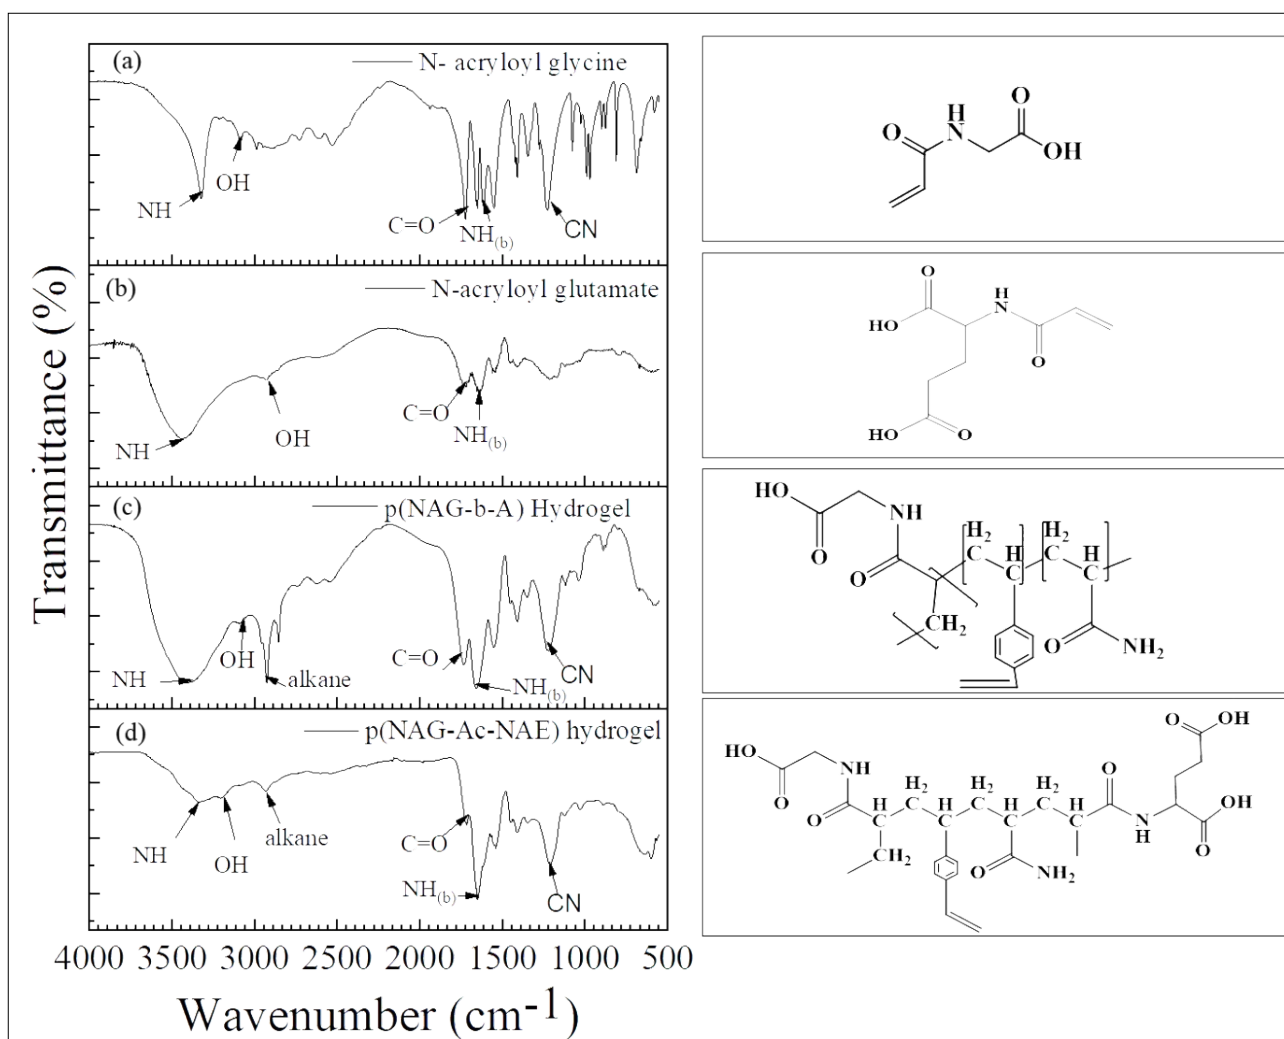

**Figure S1.** (a) FTIR spectra of N-acryloyl glycine, (b) N-acryloylglutamic acid, (c) poly [ (N-acryloyl glycine)-b-(acrylamide)] (d) poly(N-acryloyl glycine)-co-(acrylamide)-co-(N-acryloyl glutamate) co-polymeric hydrogel.

For N- acryloyl glycine, FTIR performed with KBr (Figure S1(a)): 3323 cm<sup>-1</sup> (N-H (stretching)), 3092 cm<sup>-1</sup> (-O-H stretching), 1716 cm<sup>-1</sup> (C=O (carbonyl) stretching), 1549 cm<sup>-1</sup> (-O-H overtone), 1653 cm<sup>-1</sup> (1<sup>st</sup> overtone of -NH), 1613 cm<sup>-1</sup> (C=C α,β-unsaturated ketone and due to the presence of amine).

Fig. S1(b): N- acryloyl glutamaic FTIR performed in KBr: 3413 cm<sup>-1</sup> (N-H (stretching)), 2912 cm<sup>-1</sup> and 1408 cm<sup>-1</sup> (-O-H stretching(hump); bending carboxylic acid), 1716 cm<sup>-1</sup> (C=O (carbonyl) stretching),

## **Supporting Information**

1549  $\text{cm}^{-1}$  (-O-H overtone), 1626  $\text{cm}^{-1}$  ( $-\text{NH}_2$ ), 1613  $\text{cm}^{-1}$  ( $\text{C}=\text{C}$   $\alpha$ ,  $\beta$ -unsaturated ketone, and due to the presence of amine).

Fig. S1(c): poly [(N-acryloyl glycine)-co-(acrylamide)-co-(N-acryloylglutamate)] nanohydrogel (p(NAG-Ac-NAE)) functional group analysis was performed through the ATR method: 3336  $\text{cm}^{-1}$  (N-H (stretching)), 3182  $\text{cm}^{-1}$  ( $-\text{O}-\text{H}$  stretching; strong broad carboxylic acid), 2912 ( $\text{C}-\text{H}$  stretching, conform the formation of polymer chain chain) 1716  $\text{cm}^{-1}$  ( $-\text{C}=\text{O}$  (carbonyl) stretching), 1549  $\text{cm}^{-1}$  ( $-\text{O}-\text{H}$  overtone), 1653  $\text{cm}^{-1}$  (1<sup>st</sup> overtone of  $-\text{NH}$ ).

FTIR results of poly(N-Acryloyl glycine)-co-(acrylamide)-co-(N-acryloylglutamate) hydrogel has been discussed in the main texts of the manuscript

## Supporting Information

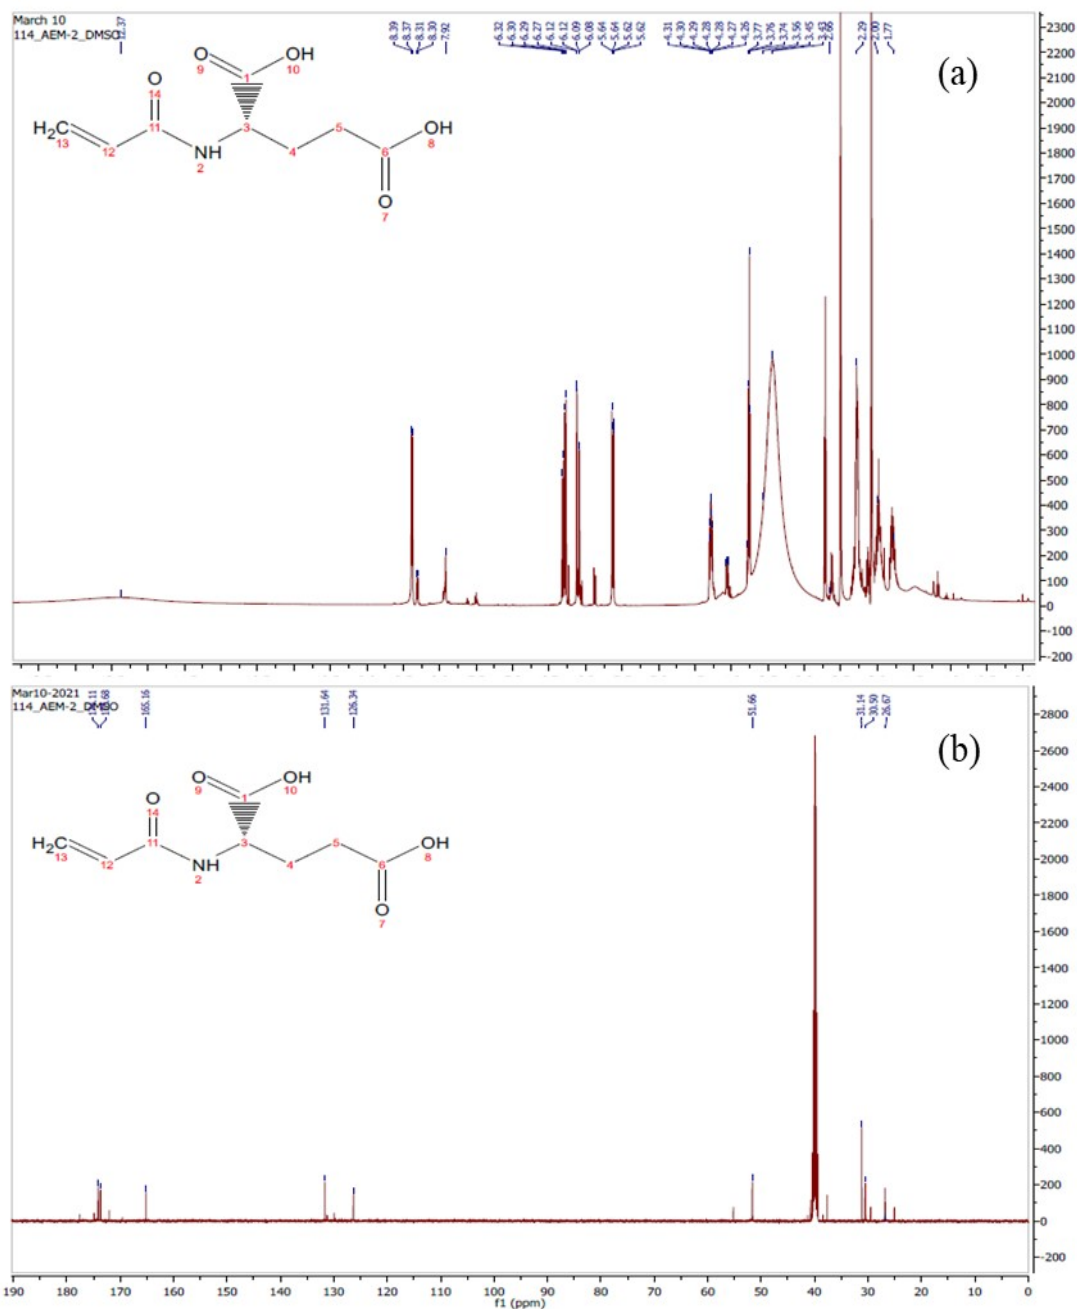

**Figure S2.** (A)  $^1\text{H}$  NMR of N-acryloylglutamate monomer and (B)  $^{13}\text{C}$  NMR of N-acryloylglutamate monomer

$^1\text{H}$  NMR spectrum chemical shifts (in ppm) (Fig. S2(a)): 12.5  $\delta$  (O—H of carboxylic acid (8<sup>th</sup> and 12<sup>th</sup> position)), 8.37  $\delta$  (N—H of 2<sup>o</sup> amines (2)), 6.13  $\delta$  ( $=\text{C}-\text{H}_2$ (13)), 6.13  $\delta$  (cis) and 5.64  $\delta$  (trans) of

## **Supporting Information**

(H<sub>2</sub>C=CH<sub>2</sub> (13 and 12)), 6.17 (—CH (12)), 4.29 δ (—CH (3)), 1.99 δ (—C—H<sub>2</sub> (4a and 4b)), 2.20 δ (—C—H<sub>2</sub> (5a and 5b)) 3.4 δ for H<sub>2</sub>O and 2.5 for DMSO-d<sub>6</sub>.

<sup>13</sup>C NMR (500MHz, DMSO-d<sub>6</sub>) (Figure S2 (b)): 174 and 173 ppm (—COOH (1 and 6)), 165 ppm (O=C—NH-R (11)), 126 ppm and 132ppm (C=C (13 and 12)) and 51.66 ppm (—CH (3)), 26.67 ppm 31.14 ppm (—CH<sub>2</sub>—CH<sub>2</sub> (4 and 5)) 40 ppm band of DMSO-d<sub>6</sub>



## Supporting Information

$^{13}\text{C}$  NMR (500 MHz in ppm;  $\text{CDCl}_3$  and  $\text{DMSO-d}_6$ ) (Figure S3(b)): 44 and 34 ppm (8+2 splinted peak of  $2^\circ$  alkane) and 86-79 ppm (carboxylic  $-\text{OH}$  and ester)

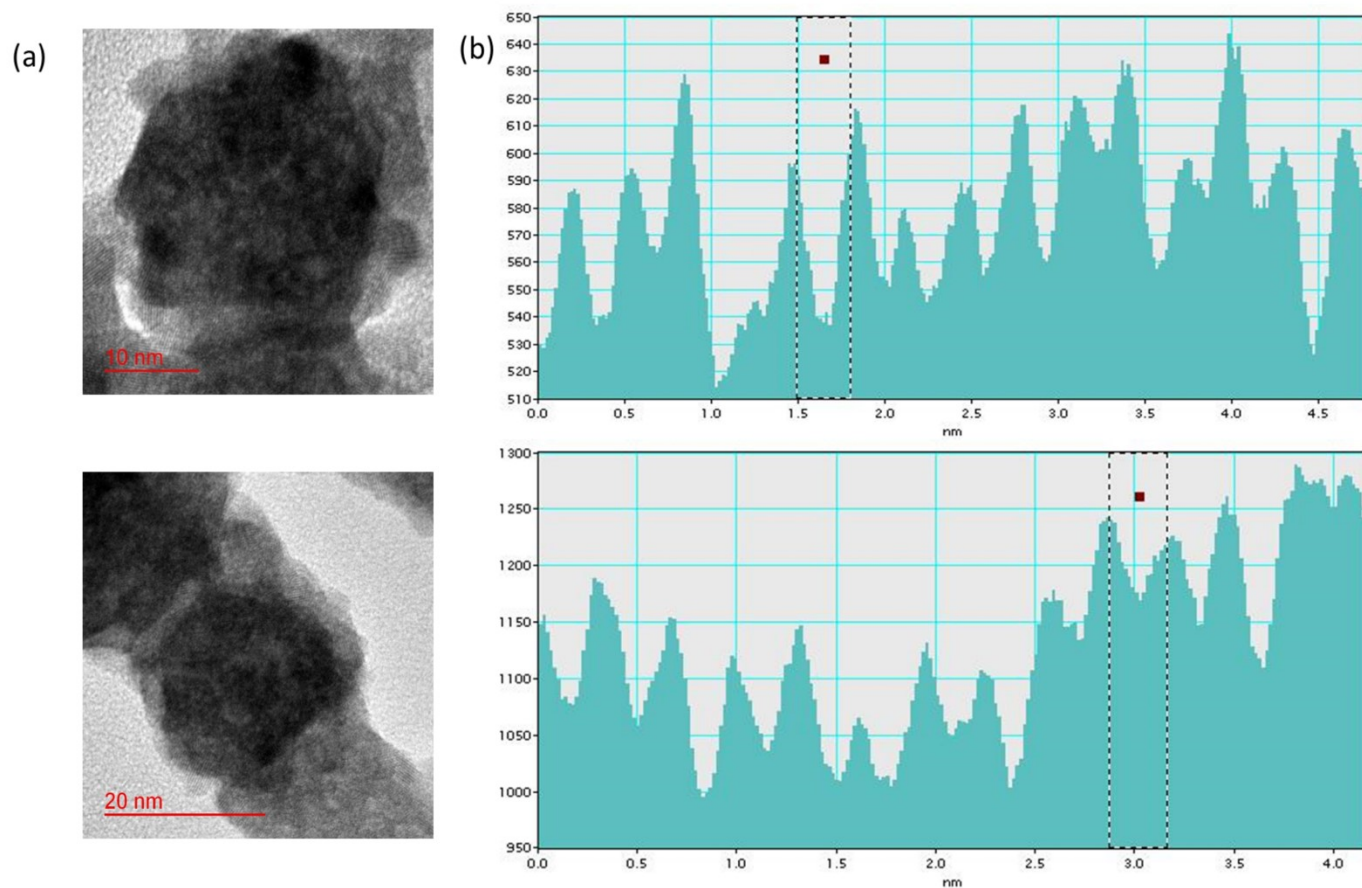

**Figure S4.** High resolution HRTEM micrograph of p(NAG-Ac-NAE) Hydrogel (a) shows the porous and semi-crystalline nature of the hydrogel particles (b) electron diffraction pattern based distance between two fringes



## Supporting Information

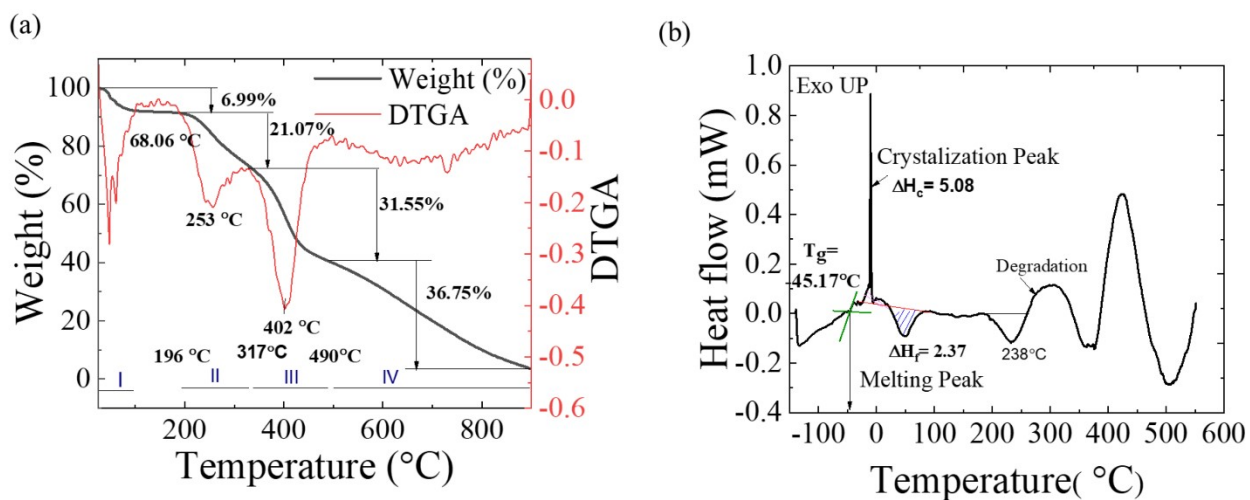

**Figure S5.** (a) TGA and (b) DSC of the poly(N-acryloyl glycine)-co-(acrylamide)-co-(N-acryloyl glutamate) hydrogel.

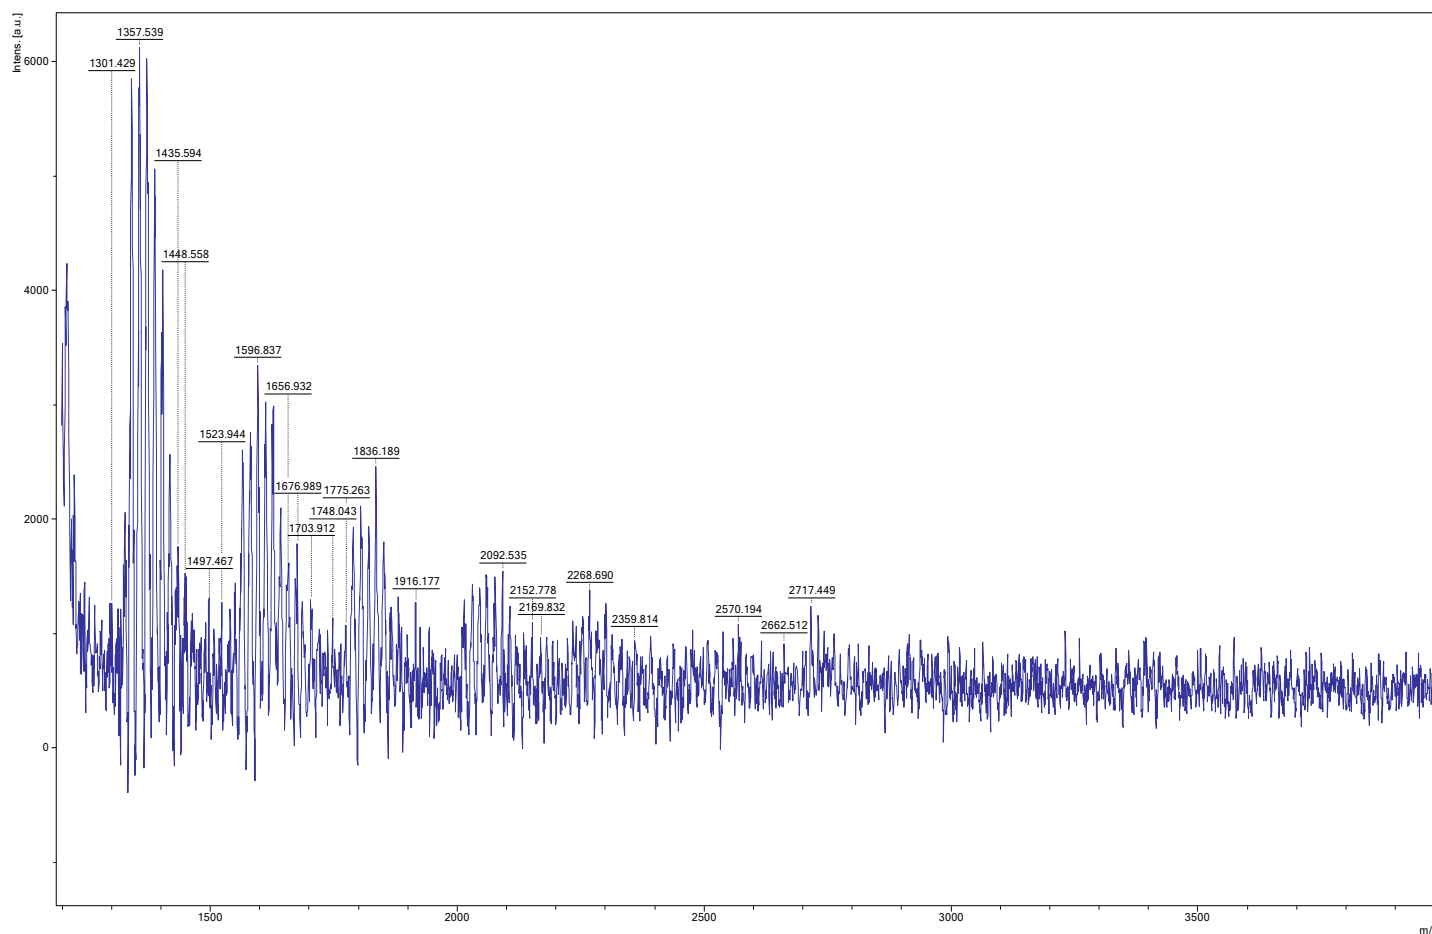

**Figure S6.** MALDI-TOF spectrum of p(NAG-Ac-NAE) hydrogel

## Supporting Information

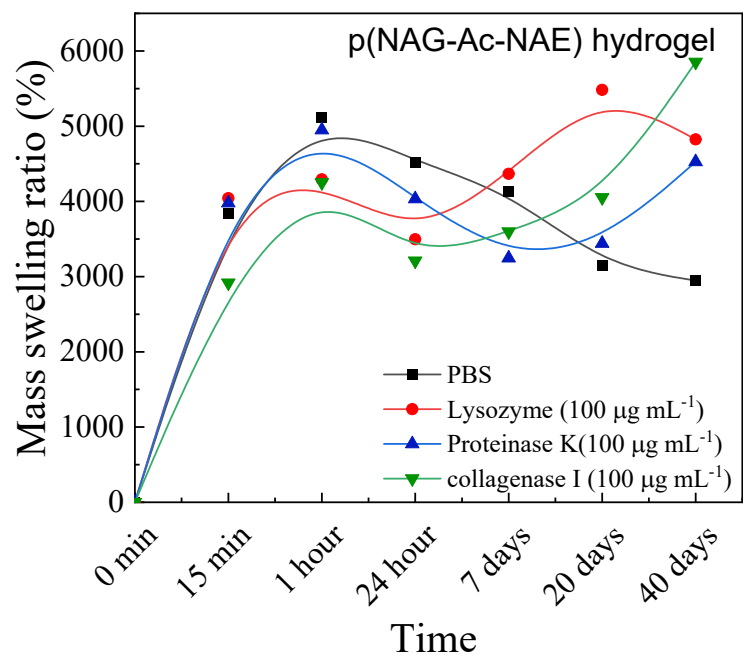

**Figure S7.** Biodegradation behavior of [p(NAG-Ac-NAE)] without replacing media, studied in PBS (pH 7.4) and in presence of different enzymes.

## Supporting Information

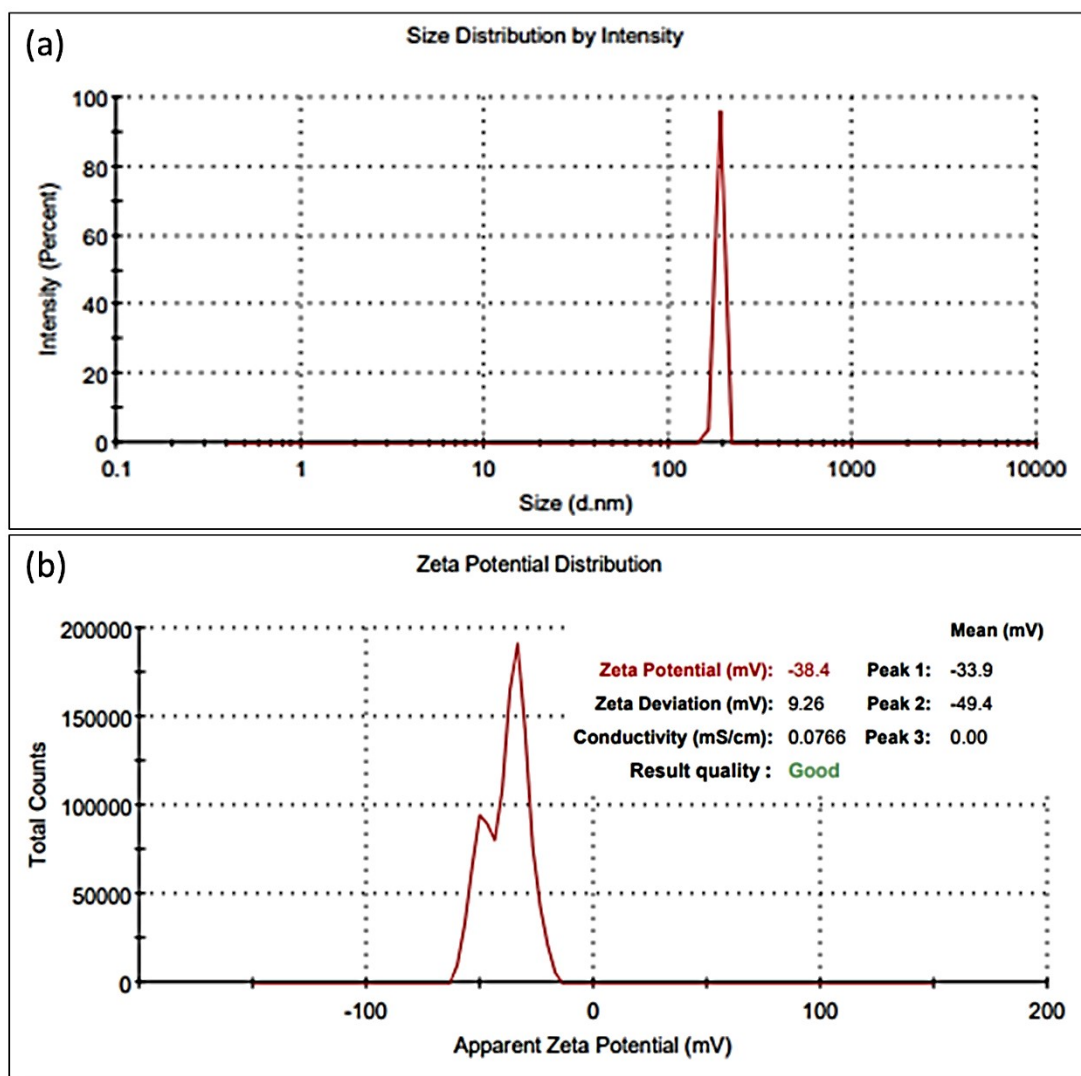

**Figure S8.** (a) Size distribution and (b) zeta potential of p(NAG-Ac-NAE) hydrogel, studied in PBS (pH 7.4)

## Supporting Information

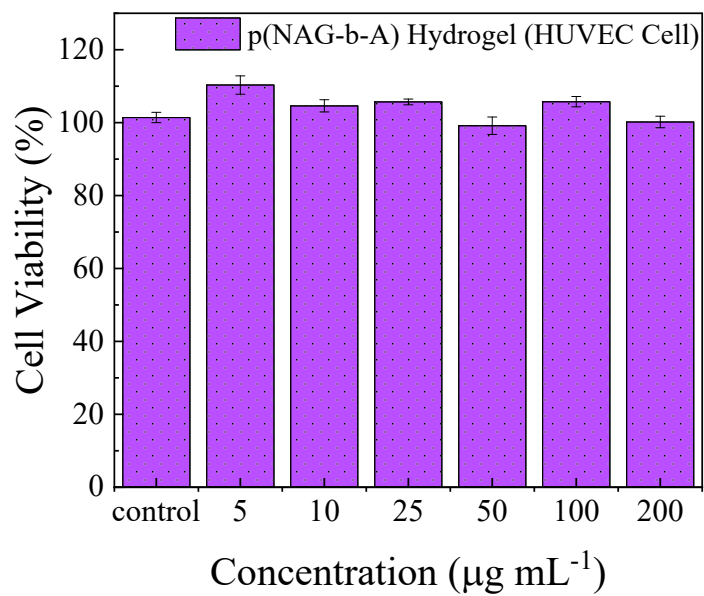

**Figure S9.** Cell viability of HUVEC cells in treatment of p(NAG-b-A) hydrogel.

## Supporting Information

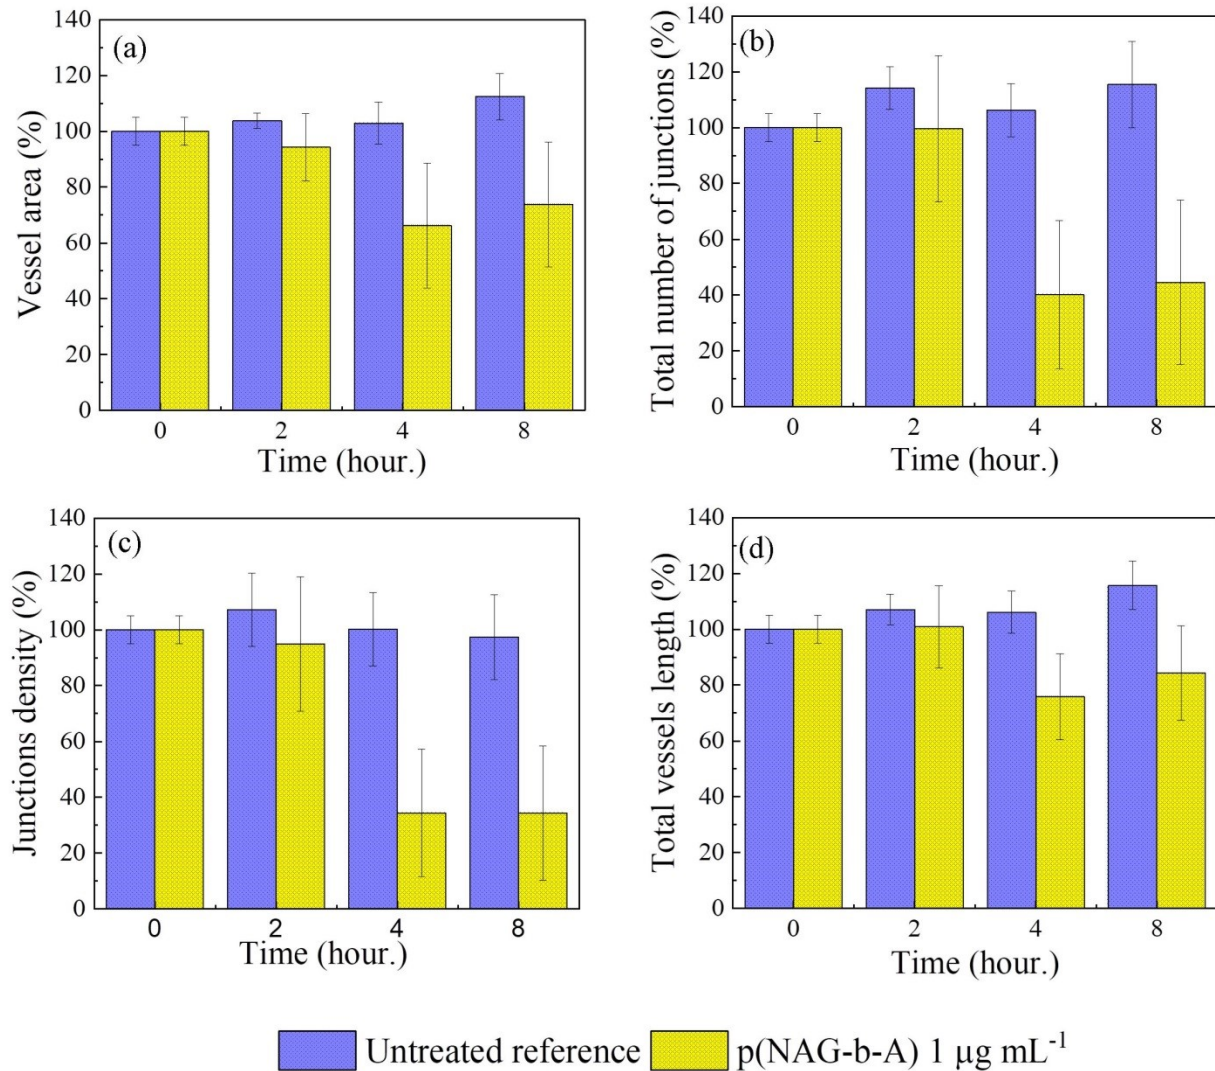

**Figure S10.** Anti-angiogenic property of p(NAG-b-A) hydrogel. (a) Vessel area (%) vs Time, (b) Total number of junctions (%) vs Time, (c) Junction density (%) vs time and (d) Total Vessel length (%) vs time.

## Supporting Information

### ABBREVIATIONS:

p(NAG-Ac-NAE), poly (N-Acryloylglycine)-co-(acrylamide)-co-(N-acryloylglutamate) co-polymeric hydrogel; p(NAG-b-A), poly(N-acryloylglycine-b-acrylamide); TNBC, Triple Negative Breast Cancer; CNS, Central Nervous System; PNS, Peripheral Nervous system; TBI, Traumatic brain injury; PLGA, Poly ( $\gamma$ -glutamic acid); AIBN, Azobisisobutyronitrile; DVB, divinylbenzene; FTIR, Fourier transforms infrared; NMR, Nuclear magnetic resonance; HRTEM, High- resolution transmission electron microscopy; XRD, X-Ray Diffraction; TGA, thermogravimetric analysis; DSC, Differential Scanning calorimetry; SAED, Selected area (electron) diffraction; PBS, Phosphate Buffered saline; MCF7, Michigan Cancer Foundation-7; MDA-MB-231, M.D. Anderson - Metastatic Breast 231; PC12, Adrenal phaeochromocytoma; LN229, Glioblastoma cells; AO, acrydin orange; PI, propidium iodide; EtBr, ethidium bromide; NGF, Nerve growth factor; HBSS, Hanks' Balanced Salt Solution; DMEM, Dulbecco's modified Eagle medium; FBS, Fetal bovine serum; MTT, 3-(4,5-dimethylthiazol-2-yl)-2,5-diphenyltetrazolium bromide; BSA, Bovine serum albumin; CEA assay, Chick embryonic assay; NPCs, Neuronal progenitor cells; AD, Alzheimer's disease; PD, Parkinson disease; H<sub>2</sub>O<sub>2</sub>, Hydrogen peroxide; AKT, three serine/threonine-specific protein kinases; *VEGF*, *Vascular endothelial growth factor*; PI3K, Phosphoinositide 3-kinases; mTOR, Mammalian target of rapamycin; FESEM, Field emission scanning electron microscopy; G'', Loss modulus; G', Storage modulus;  $\eta^*$ , Complex viscosity;  $\omega$ , Angular frequency; ANOVA, Analysis of Variance
